# Supplementary material for: Cis-9, Trans-11 CLA Alleviates Lipopolysaccharide-Induced Depression of Fatty Acid Synthesis by Inhibiting Oxidative Stress and Autophagy in Bovine Mammary Epithelial Cells
Source: MDPI journal article supplement (doi:10.3390/antiox11010055), 2021-12-27
Supplement: s1 [file s1]

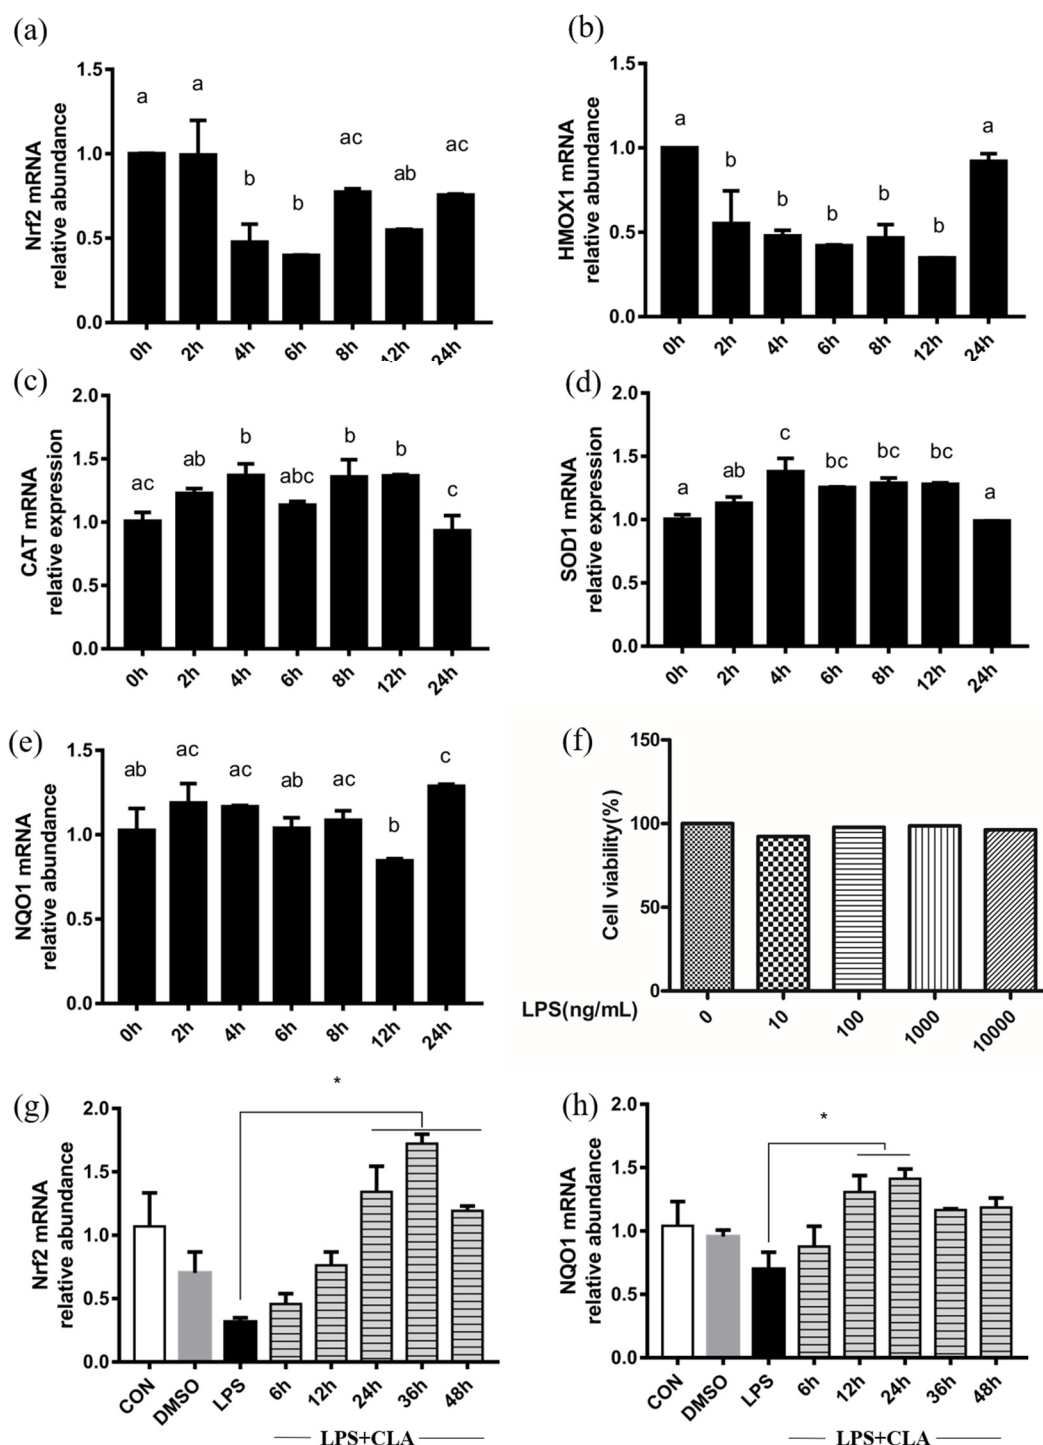

**Figure S1.** | Exploration of treatment time of LPS and CLA on mRNA abundance of anti-oxidative genes in BMECs. (a–e) BMECs were treated with 8  $\mu$ g/mL LPS for 0, 2, 4, 6, 8, 12 and 24 h. (f) BMECs were treated with 1, 10, 100, 1000, 10000 ng/mL LPS for 48h to measure cell viability. Cell viability was detected by cell counting kit-8 (CCK-8). (g,h) BMECs were pretreated with CLA for 6, 12, 24, 36 and 48 h, then followed by treatment with 8  $\mu$ g/mL LPS for 12h (LPS + CLA group). The gene expression was normalized to the gene expression of GAPDH. The data are presented as the means  $\pm$  SEM. Different letters represented significant differences between groups ( $p < 0.05$ ). \*  $p < 0.05$ , represented significant differences between LPS group and LPS + CLA group.

**Table S1.** Determination of CAT, GSH, TBARS and SOD.

| Indicators                                      | Description about methods                                                                                                                                                                                                                                                                                                                                                                                                                                                                                                                                                                                                                                                                                                                                                                                                                                                                                                                                            |
|-------------------------------------------------|----------------------------------------------------------------------------------------------------------------------------------------------------------------------------------------------------------------------------------------------------------------------------------------------------------------------------------------------------------------------------------------------------------------------------------------------------------------------------------------------------------------------------------------------------------------------------------------------------------------------------------------------------------------------------------------------------------------------------------------------------------------------------------------------------------------------------------------------------------------------------------------------------------------------------------------------------------------------|
| Catalase (CAT)                                  | The kit uses the ammonium molybdate method, that is, the reaction of CAT decomposing $H_2O_2$ can be quickly terminated by ammonium molybdate, and the remaining $H_2O_2$ reacts with ammonium molybdate to form a pale-yellow complex, whose OD value can be measured at 405nm to calculate CAT activity, as described by Goth [68]. Before determination, it is necessary to dilute 10% tissue or cell homogenate with physiological saline or PBS to different concentrations for pre-experiment, the proportional concentration of homogenate was selected for formal experiment. One unit of CAT activity was defined as the amount of enzyme decomposing 1 $\mu$ mol of $H_2O_2$ in 1 s. The final result was normalized by protein concentration (mgprot/mL) and the unit of the final result was U/mgprot.                                                                                                                                                   |
| Superoxide Dismutase (SOD)                      | This detection adopts WST reaction system that contains xanthine; xanthine oxidase produces the superoxide anion free radical ( $O_2^{\cdot-}$ ). WST can react with the superoxide anion in the tissue to produce water-soluble dye WST formazan, and this process can be inhibited by SOD, as described by Ukeda et al. [69]. Before using this kit to test samples, individual samples should be selected and diluted to different concentrations for pre-experiment. A dilution ratio of 40%-60% SOD inhibition rate should be selected for formal test. After each sample was tested according to the kit instruction, the OD value was read at 450nm wavelength. In this reaction system, when the SOD inhibition rate reaches 50%, the amount of enzyme corresponding to one SOD activity unit (U). The limit of detection is 0.5 U/mL. The final result was normalized by protein concentration (mg prot/mL) and the unit of the final result was U/mg prot. |
| Reduced glutathione (GSH)                       | Reduced glutathione, a tripeptide of glutamic acid, cysteine, and glycine, is the most important non-enzymatic antioxidant in the body. Cysteine contains a sulfhydryl group (-SH), which can react with DTNB and break the disulfide bond of DTNB to generate yellow compound, 2-nitro-5-thiobenzoic acid (NTB-), as described by Tietze [70]. The OD value of NTB- is measured at 405nm. GSH content is quantitatively determined by colorimetric method. Standard curves were made with different concentrations of standard GSH (100 $\mu$ mol/L, 50 $\mu$ mol/L, 20 $\mu$ mol/L, 10 $\mu$ mol/L, 5 $\mu$ mol/L, 0 $\mu$ mol/L), and sample concentration was calculated according to the standard curves. The sensitivity of the kit is 1.5 $\mu$ mol/L. The final result was normalized by protein concentration (mgprot/mL) and the unit of the final result was $\mu$ mol/gprot.                                                                             |
| Thiobarbituric acid-reactive substances (TBARS) | 1. Lipid peroxidation products (thiobarbituric acid-reactive substances) can be combined with thiobarbituric acid (TBA) to form a red product with a maximum absorption peak at 532nm, as described by Pryor [71]. The variable coefficient (CV)= 1.5%. Lipid peroxidation was expressed as nanomoles of MDA per milligram of protein. Since this TBA test has many limitations to reflect the real state of lipid peroxidation, it need combine with other markers to indicate the redox state of tissue or cell.                                                                                                                                                                                                                                                                                                                                                                                                                                                   |

**Table S2.** Primers used in quantitative real-time PCR analysis.

| Target Gene <sup>1</sup> |         | Primer sequence           | Accession #    | Product(bp) |
|--------------------------|---------|---------------------------|----------------|-------------|
| ACACA                    | Forward | AGCTGAATTTTCGCAGCAAT      | NM_174224.2    | 117         |
|                          | Reverse | GGTTTTCTCCCCAGGAAAAG      |                |             |
| ACSL1                    | Forward | GTGGGCTCCTTTGAAGAACTGT    | BC119914       | 120         |
|                          | Reverse | ATAGATGCCTTTGACCTGTTCAAAT |                |             |
| ACSS2                    | Forward | GGCGAATGCCTCTACTGCTT      | BC134532       | 100         |
|                          | Reverse | GGCCAATCTTTTCTCTAATCTGCTT |                |             |
| AGPAT6                   | Forward | AAGCAAGTTGCCCATCCTCA      | DY208485       | 101         |
|                          | Reverse | AAACTGTGGCTCCAATTTCTGA    |                |             |
| BTN1A1                   | Forward | AGGACGGACTGGGCAATTG       | M35551         | 81          |
|                          | Reverse | GAACCCATTCTCGGGAGTCAT     |                |             |
| CAT                      | Forward | TCACTCAGGTGCGGACTTTC      | NM_001035386.2 | 163         |
|                          | Reverse | TGGATGCGGGAGCCATATTC      |                |             |
| CD36                     | Forward | GTACAGATGCAGCCTCATTTCC    | X91503         | 81          |
|                          | Reverse | TGGACCTGCAAATATCAGAGGA    |                |             |
| CUL3                     | Forward | CTTTCCGATGACCATGG         | NM_001192806.2 | 110         |
|                          | Reverse | GCTCCTCAAACTAAGACCACTG    |                |             |
| DGAT1                    | Forward | CCACTGGGACCTGAGGTGTC      | NM_174693      | 101         |
|                          | Reverse | GCATCACACACACCAATTCA      |                |             |
| DGAT2                    | Forward | CATGTACACATTCTGCACCGATT   | BT030532.1     | 100         |
|                          | Reverse | TGACCTCCTGCCACCTTCT       |                |             |
| FABP3                    | Forward | GAAGTCGACTCCCAGCTTGAA     | DN518905       | 102         |
|                          | Reverse | AAGCCTACCACAATCATCGAAG    |                |             |
| FASN                     | Forward | GCATCGCTGGCTACTCCTAC      | CR552737       | 92          |
|                          | Reverse | GTGTAGGCCATCACGAAGGT      |                |             |
| FATP-1                   | Forward | CTGTACGAGGAACTGCAGAAGGT   | NM_001033625.2 | 98          |
|                          | Reverse | TGAATTTTGAAGGTGCCTGTAGTG  |                |             |
| GCLC                     | Forward | ATTGGGTGGAGAGTGGA         | NM_001083674   | 133         |
|                          | Reverse | ACAGCGGGATGAGAAAGT        |                |             |
| GCLM                     | Forward | TGGAGCAGCTGTATCAGTGG      | NM_001083674   | 198         |
|                          | Reverse | GAATGTCAGGGATGCTCTCC      |                |             |
| GPAT3                    | Forward | CCCCCATGACCAGAGAGGA       | NM_001192514.3 | 103         |
|                          | Reverse | CCATCCCAAGGAAGCTCAGTC     |                |             |
| GPX1                     | Forward | CTTCAACCTGTCTCCCT         | NM_174076.3    | 98          |
|                          | Reverse | GGTCATTCATCTGGGTGT        |                |             |
| GSR                      | Forward | CGCTGAGAACCCAGAG          | NM_001114190.2 | 100         |
|                          | Reverse | AAACGGAAAGTGGAACAGTAAGTA  |                |             |
| GSS                      | Forward | CGAGTGATCCAATGCAT         | NM_001015630.1 | 90          |
|                          | Reverse | ATGTCCCACGTGCTTGTTTAT     |                |             |
| GSTM1                    | Forward | ATCTGCTACAGCCCTGA         | NM_175825      | 100         |
|                          | Reverse | AAGGCCTCTTCCCCAGAAAC      |                |             |
| GSTP                     | Forward | TTTGCGGACTACAACCTG        | NM_177516.1    | 186         |
|                          | Reverse | CCCTCACTGTTTCCCAT         |                |             |
| HMOX1                    | Forward | GAACGCAACAAGGAGAAC        | NM_001014912   | 162         |
|                          | Reverse | CTGGAGTCGCTGAACATAG       |                |             |
| IL10                     | Forward | AGCACTACTCTGTTGCCTGG      | NM_174088.1    | 230         |
|                          | Reverse | TTGGGGTAGACTTTGGGGTCT     |                |             |
| IL6                      | Forward | GGAGGAAAAGGACGGATGCT      | NM_173923.2    | 227         |
|                          | Reverse | GGTCAGTGTGTTGTGGCTGGA     |                |             |
| IL-8                     | Forward | CCTCTTGTTCAATATGACTTCCA   | NM_173925.2    | 170         |
|                          | Reverse | GGCCCACTCTCAATAACTCTC     |                |             |
| KEAP1                    | Forward | ACAACAGTGTGGAGAG          | NM_001101142.1 | 108         |
|                          | Reverse | AGAGCAGACGGTTGAGGACAG     |                |             |
| LPL                      | Forward | GGGTTTTGAGCAAGGGTACA      | NM_001075120.1 | 193         |
|                          | Reverse | GCCACAATGACCTTTCCAGT      |                |             |
| ME1                      | Forward | CCAACTGCCCTCATTGGAGT      | NM_001144853   | 166         |
|                          | Reverse | CGCGACCCTTGGTCAGTTTA      |                |             |
| Nrf2                     | Forward | AGGACATGGATTTGATT         | NM_001011678.2 | 272         |
|                          | Reverse | TACCTGGGAGTAGTTGGCA       |                |             |
| NQO1                     | Forward | CAACAGACCAGCCAATCA        | NM_001034535   | 144         |

|          |         |                        |                |     |
|----------|---------|------------------------|----------------|-----|
| PLIN1    | Reverse | ACCTCCCATCCTTTTCCTC    | DV814745       | 108 |
|          | Forward | GATCGCCTCTGAGCTGAAGG   |                |     |
| PPARG    | Reverse | AGAGCGGCCCTAGGATTT     | NM_181024.2    | 100 |
|          | Forward | GAGCCCAAGTTCGAGTT      |                |     |
| PPARGC1A | Reverse | GGCGGTCTCCACTGAGAATAAT | NM_177945      | 120 |
|          | Forward | GTACCAGCACGAAAGGCTCAA  |                |     |
| SCD      | Reverse | ATCACACGGCGCTCTTCAA    | NM_173959.4    | 151 |
|          | Forward | TTATTCCGTTATGCCCTTGG   |                |     |
| SOD      | Reverse | GGTAGTTGTGGAAGCCCTCA   | NM_174615.2    | 146 |
|          | Forward | TGTTGGAGACCTGGGCAATG   |                |     |
| SREBP1   | Reverse | CTCTGCCCCAAGTCATCTGGTT | NM_001113302.1 | 243 |
|          | Forward | CACTCGTCTTCTCTGTCTC    |                |     |
| TXN      | Reverse | GAGTGACTGGTTCTCCATAG   | NM_173968      | 136 |
|          | Forward | TAGTCGACTTCTCAGCCACG   |                |     |
| TXNRD    | Reverse | CACTCTGCAGCAACATCCTGA  | NM_174625      | 100 |
|          | Forward | GTGTGAATGTGGGTTGCATACC |                |     |
| GAPDH    | Reverse | TCCTCGACGTTCCACCCATA   | NM_001034034   | 176 |
|          | Forward | GGGTCATCATCTCTGCACCT   |                |     |
|          | Reverse | GGTCATAAGTCCCTCCACGA   |                |     |

**Table S3.** Information of antibodies used in western-blot analysis.

| Target protein                            | Cat. #     | Dilution | Category           | Manufacture              |
|-------------------------------------------|------------|----------|--------------------|--------------------------|
| AMPK                                      | AF1627     | 1:1000   | Primary antibody   | Beyotime biotechnology   |
| p-AMPK                                    | AA393      | 1:800    | Primary antibody   | Beyotime biotechnology   |
| Nrf2                                      | AF0639     | 1:500    | Primary antibody   | Affinity                 |
| p-Nrf2                                    | A1609      | 1:200    | Primary antibody   | Beyotime biotechnology   |
| HMOX-1                                    | AF1333     | 1:1000   | Primary antibody   | Beyotime biotechnology   |
| GAPDH                                     | 60004-1-Ig | 1:5000   | Primary antibody   | Proteintech              |
| ACACA                                     | AF1867     | 1:1000   | Primary antibody   | Beyotime biotechnology   |
| p-ACACA                                   | AA110      | 1:1000   | Primary antibody   | Beyotime biotechnology   |
| PPARG                                     | Bs-0530R   | 1:500    | Primary antibody   | Bioss antibodies         |
| SREBP1                                    | AF8055     | 1:1000   | Primary antibody   | Beyotime biotechnology   |
| SCD                                       | SC-23016   | 1:200    | Primary antibody   | Santa Cruz Biotechnology |
| β-actin                                   | AF0003     | 1:1000   | Primary antibody   | Beyotime biotechnology   |
| Anti-rabbit IgG, HRP-linked Antibody      | A0208      | 1:1000   | Secondary antibody | Beyotime biotechnology   |
| Anti-mouse IgG, HRP-linked Antibody       | A0216      | 1:1000   | Secondary antibody | Beyotime biotechnology   |
| Anti-goat IgG, HRP-linked Antibody        | S0010      | 1:5000   | Secondary antibody | Affinity                 |
| FITC conjugated goat anti-rabbit antibody | A0562      | 1:1000   | Secondary antibody | Beyotime biotechnology   |
| FITC conjugated goat anti-mouse antibody  | A0568      | 1:1000   | Secondary antibody | Beyotime biotechnology   |

## Reference

68. Góth, L. A simple method for determination of serum catalase activity and revision of reference range. *Clinica chimica acta; international journal of clinical chemistry* **1991**, 196, 143–151, doi:10.1016/0009-8981(91)90067-m.
69. Ukeda, H.; Kawana, D.; Maeda, S.; Sawamura, M. Spectrophotometric Assay for Superoxide Dismutase Based on the Reduction of Highly Water-soluble Tetrazolium Salts by Xanthine-Xanthine Oxidase. *Bioscience, biotechnology, and biochemistry* **1999**, 63, 485–488, doi:10.1271/bbb.63.485.
70. Tietze, F. Enzymic method for quantitative determination of nanogram amounts of total and oxidized glutathione: Applications to mammalian blood and other tissues. *Analytical biochemistry* **1969**, 27, 502–522, doi:10.1016/0003-2697(69)90064-5.
71. Pryor, W.A. On the detection of lipid hydroperoxides in biological samples. *Free radical biology & medicine* **1989**, 7, 177–178, doi:10.1016/0891-5849(89)90010-5.
